# Supplementary figures and images for: Brain activity and connectivity during poetry composition: Toward a multidimensional model of the creative process
Source: PubMed Central journal article supplement — Hum Brain Mapp. 2015 May 26;36(9):3351–72. doi: 10.1002/hbm.22849 (PMC4581594; doi:10.1002/hbm.22849), 2015-05-26

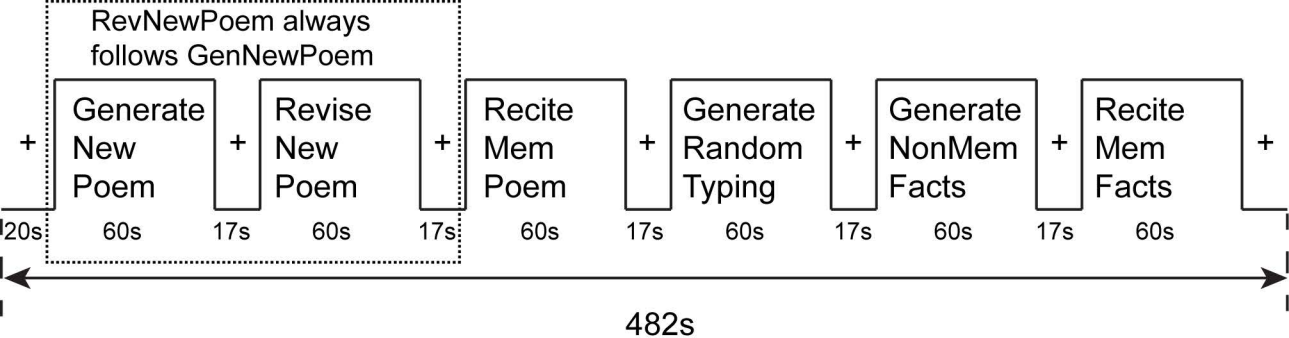

A

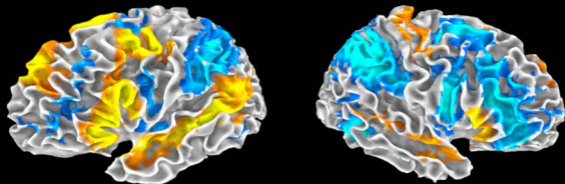

B

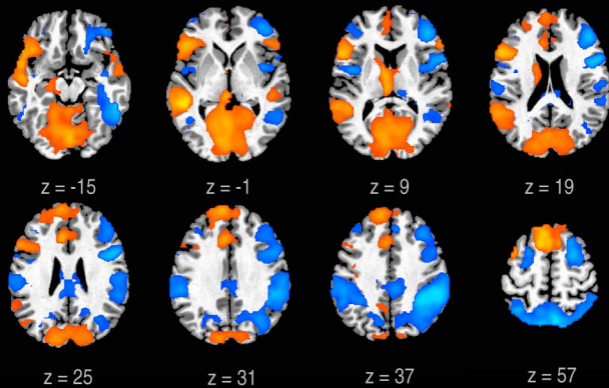

-10

t

11.3

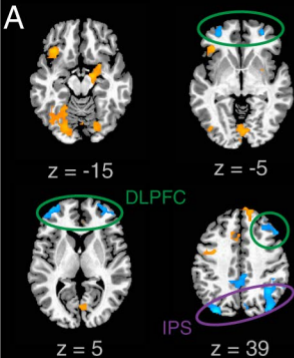

**B**

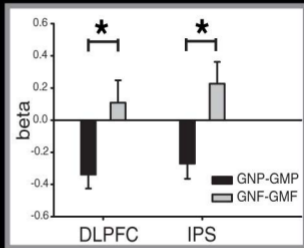

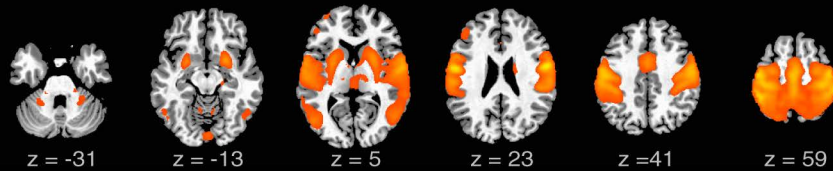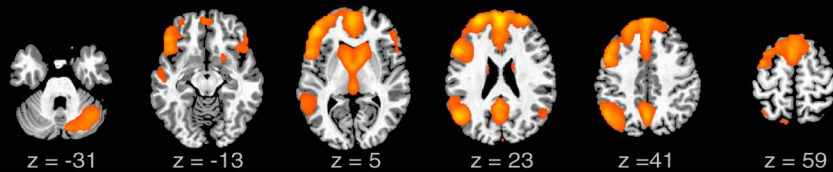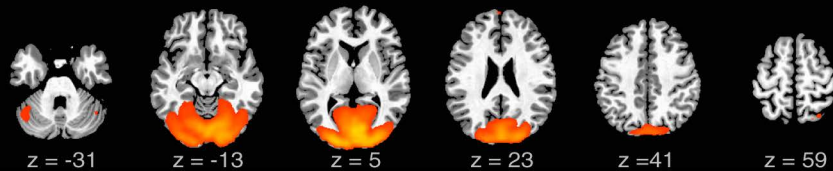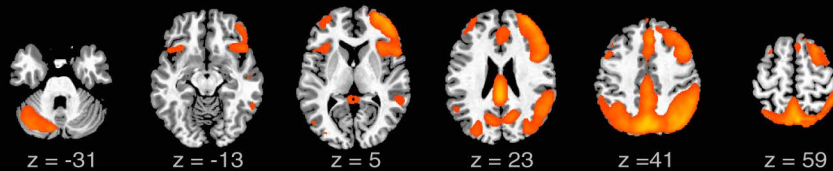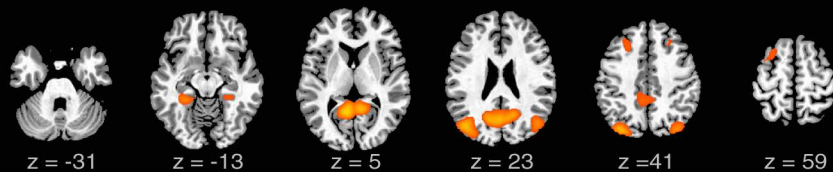

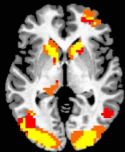

$z = -2$

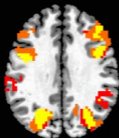

$z = 30$

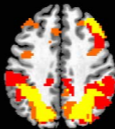

$z = 38$

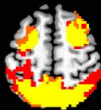

$z = 54$

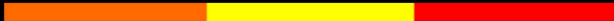

Novices

Common

Experts

# PCN + DMN (IC29)

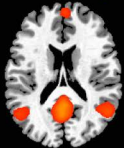

$z = 17$

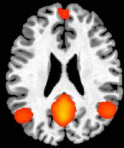

$z = 23$

# OFC (IC36)

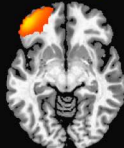

$z = -9$

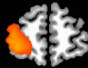

$y = 57$

Supplement: NIHMS693079-supplement-Supp_FigureS1-S6.pdf [file NIHMS693079-supplement-Supp_FigureS1-S6.pdf]
